# Supplementary material for: Mitigating Surface Influence Challenges in Continuous CO2 Monitoring Using the Borehole Portable Active Seismic Source (B-PASS)
Source: Research Square preprint supplement (doi:10.21203/rs.3.rs-6496917/v1), 2025-05-28
Supplement: Supplementary file 1 [file 02d42cbbce25ae21313b7aa5.pdf]

## Effect of urban noise on seismic signals

This section visualizes the results of heat maps to quantify the impact of temporal variations of environmental noise on vertical B-PASS at depth 50 cm in station at 3 profiles in the Figure 3b:

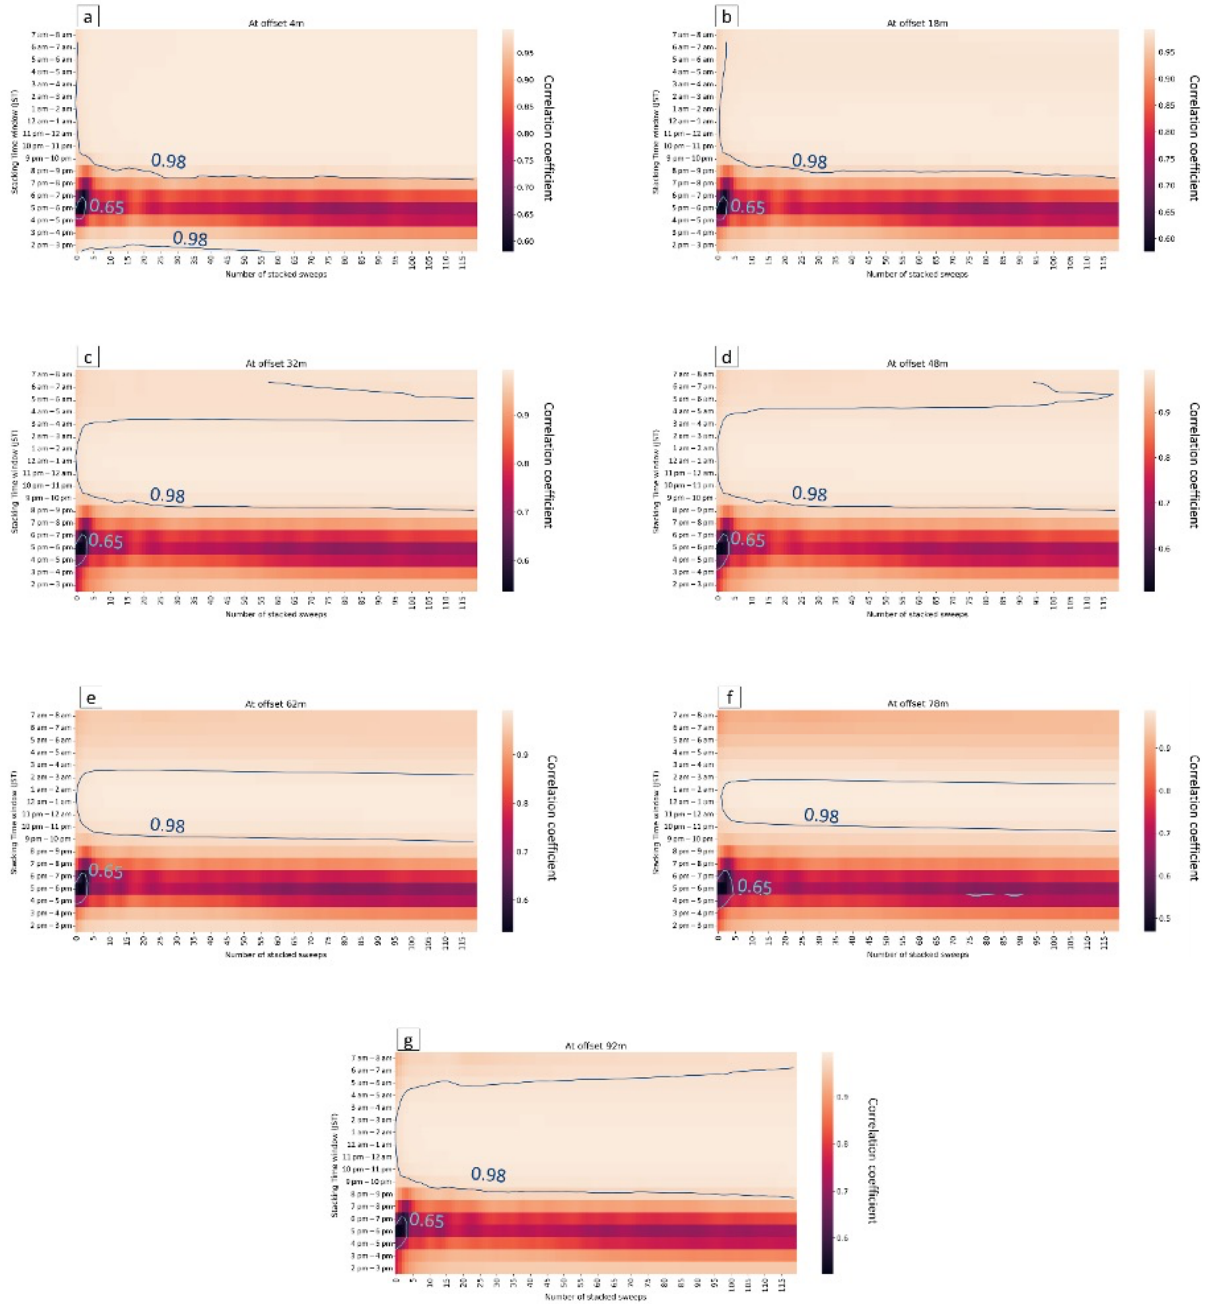

Figure S1. Correlation coefficient heat map between 2250 stacked sweeps and various numbers of stacked sweeps of the vertical-motion B-PASS system at a depth of 0.5 m for profile 1. This figure displays the correlation coefficient at 18 times windows from 2 pm to 8 am. Profile 1 includes 7 stations at 4, 18, 32, 48, 62, 78 and 92 m (panels a-g).

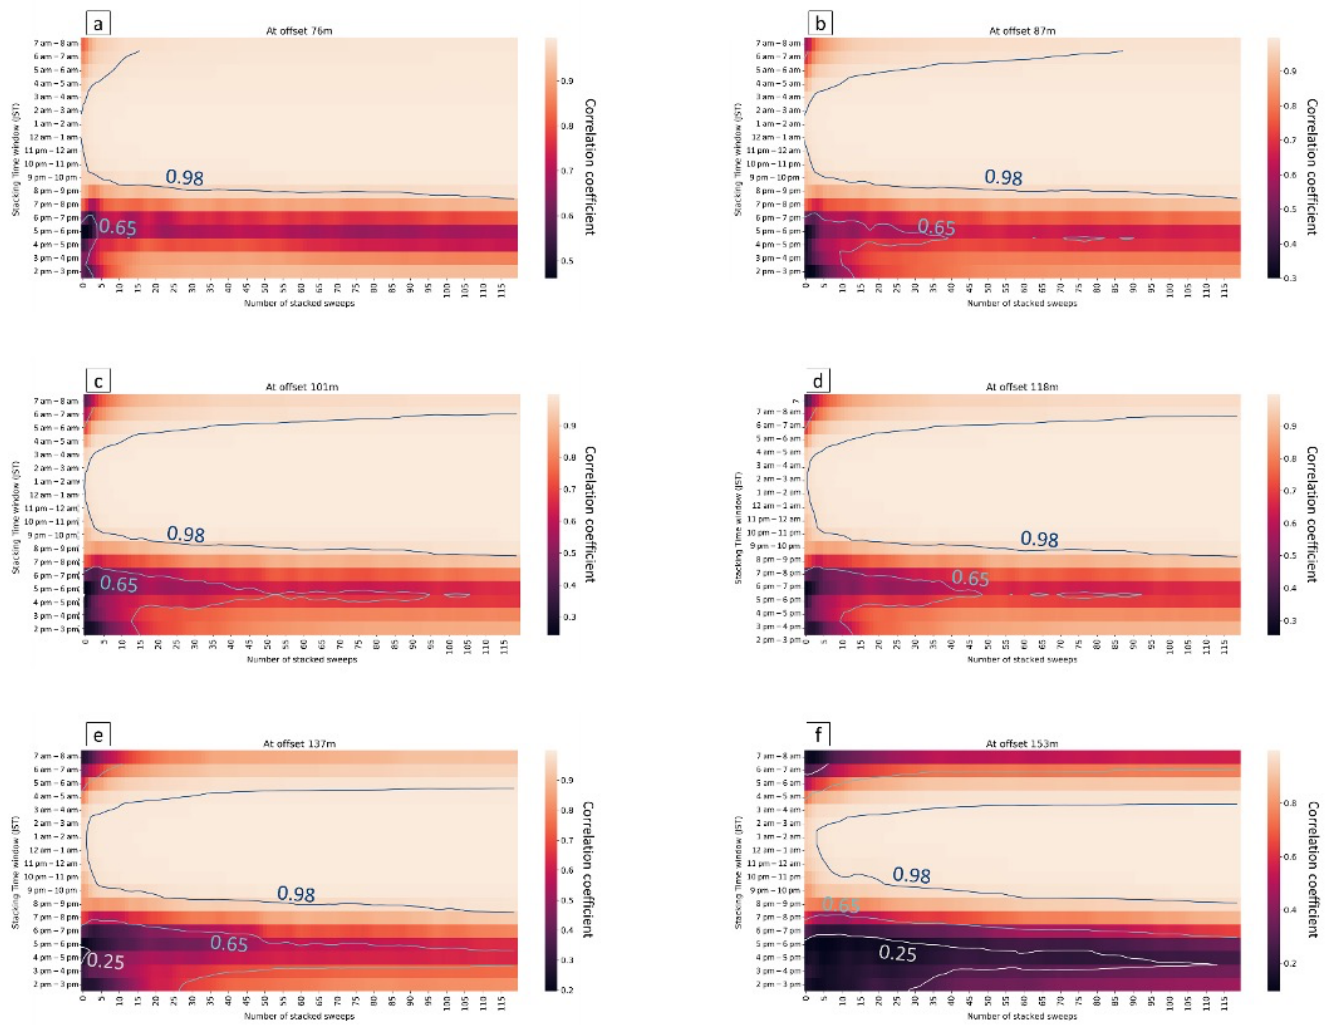

Figure S2. Correlation coefficient heat map between 2250 stacked sweeps and various numbers of stacked sweeps of the vertical-motion B-PASS system at a depth of 0.5 m for profile 2. This figure displays the correlation coefficient at 18 times windows from 2 pm to 8 am. Profile 2 includes 6 stations at 76, 87, 101, 118, 137 and 153 m (panels a-f).

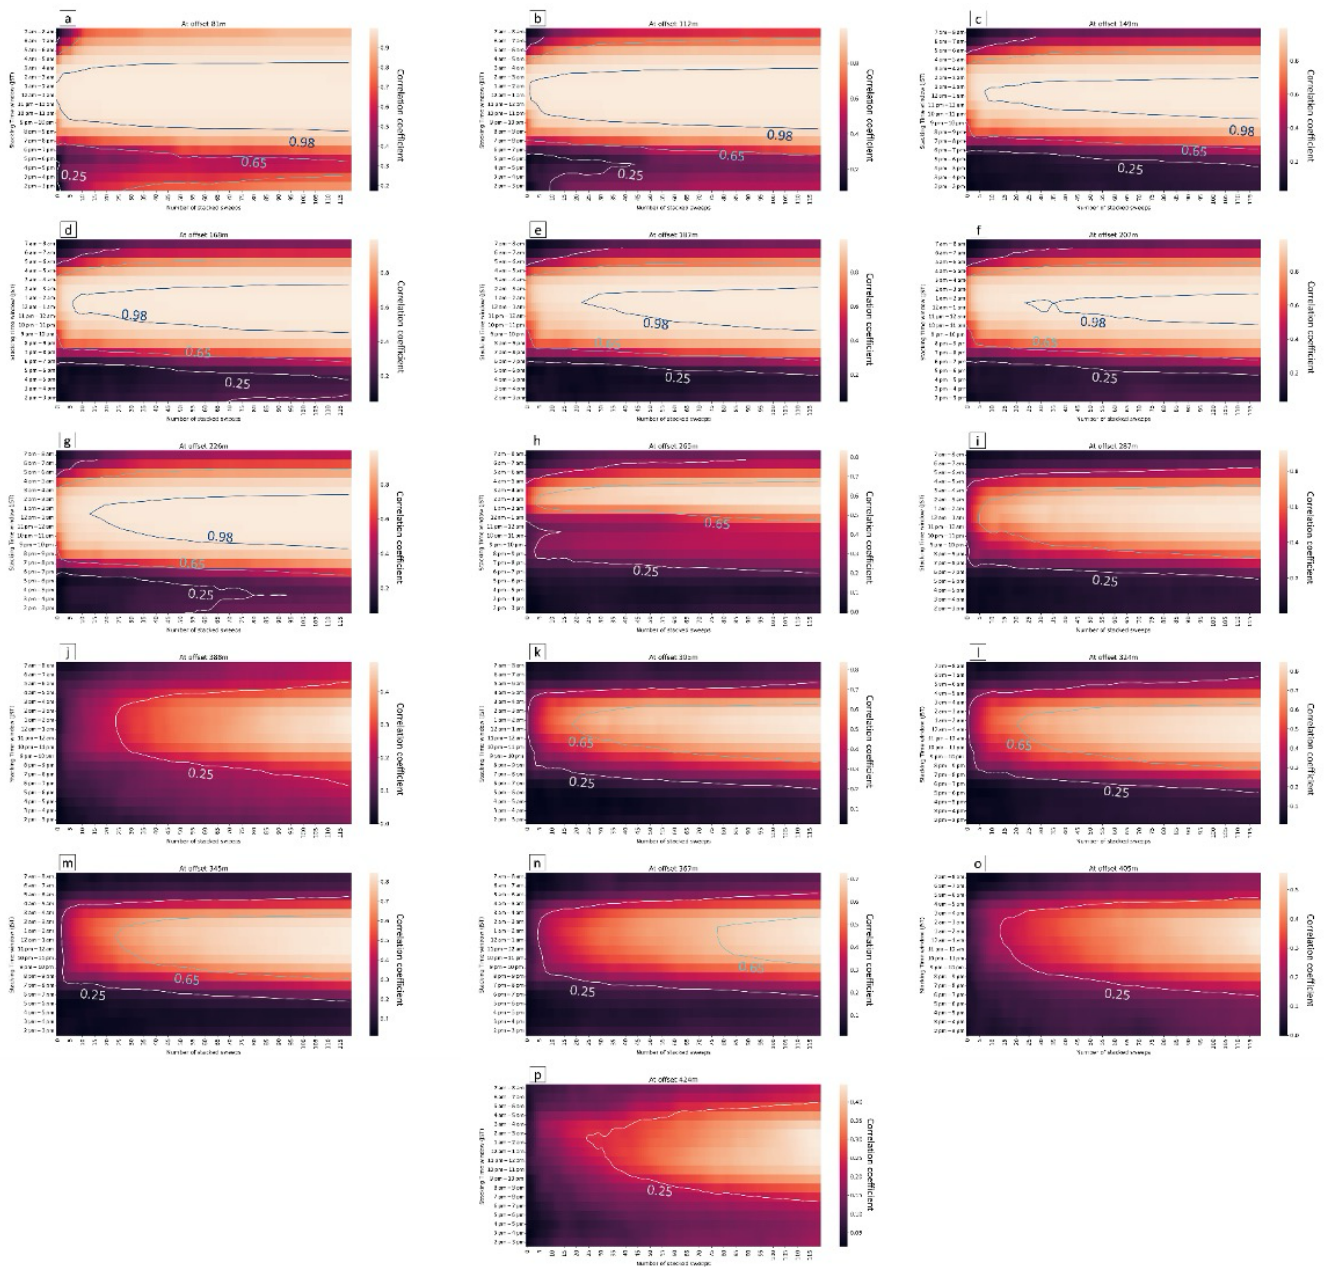

Figure S3. Correlation coefficient heat map between 2250 stacked sweeps and various numbers of stacked sweeps of the vertical-motion B-PASS system at a depth of 0.5 m for profile 3. This figure displays the correlation coefficient at 18 times windows from 2 pm to 8 am. Profile 3 includes 16 stations at 81, 112, 149, 168, 187, 207, 226, 265, 287, 305, 324, 345, 367, 388, 405 and 424 m offset (panels a-p).
